# Supplementary material for: Feasibility of a promising pulsed electrostimulator for rapid motor recovery of foot drop
Source: PubMed Central journal article supplement (PMC10847864; doi:10.1016/j.heliyon.2024.e25176), 2024-02-01
Supplement: mmc1.pdf [file mmc1.pdf]

This document certifies that the manuscript

Feasibility of a promising pulsed electrostimulator for rapid motor recovery of foot drop

prepared by the authors

Yu-Cheng Chang, Yuan-Ping Chao, Shin-Tsu Chang

was edited for proper English language, grammar, punctuation, spelling, and overall style by one or more of the highly qualified native English speaking editors at SNAS.

This certificate was issued on **September 23, 2022** and may be verified on the [SNAS website](#) using the verification code **01C5-AEF8-1CC9-BBDA-B4AP**.

Neither the research content nor the authors' intentions were altered in any way during the editing process. Documents receiving this certification should be English-ready for publication; however, the author has the ability to accept or reject our suggestions and changes. To verify the final

SNAS edited version, please visit our verification page at [secure.authorservices.springernature.com/certificate/verify](https://secure.authorservices.springernature.com/certificate/verify).

If you have any questions or concerns about this edited document, please contact SNAS at [support@as.springernature.com](mailto:support@as.springernature.com).
